# Supplementary material for: High-Dimensional Analysis of Postsplenectomy Peripheral Immune Cell Changes
Source: PubMed Central journal article supplement — Immunohorizons. Author manuscript; Available in PMC 2020 Sep 7. (PMC7476217; doi:10.4049/immunohorizons.1900089), 2020-02-18
Supplement: NIHMS1622949-supplement-Supplemental_Materials.pdf [file NIHMS1622949-supplement-Supplemental_Materials.pdf]

**Supplementary Figure 1. Changes in individual white blood cell populations – eosinophils, basophils, and immature granulocytes.** The percentage (A) and absolute number (B) of eosinophils, the percentage (C) and absolute number (D) of basophils, and the percentage (E) and absolute number (F) of immature granulocytes per time point. The blue line indicates the splenectomized patients, the grey line the control surgery patients. The asterisks (\*) indicate statistical significance between the two groups. The Roman numerals indicate statistical significance between a certain time point and baseline. \*//I indicate a  $p$ -value of  $\leq 0.05$ , \*\*//II of  $\leq 0.01$ , \*\*\*//III of  $\leq 0.001$  and \*\*\*\*//IV of  $\leq 0.0001$ . Dotted lines denote normal reference range.

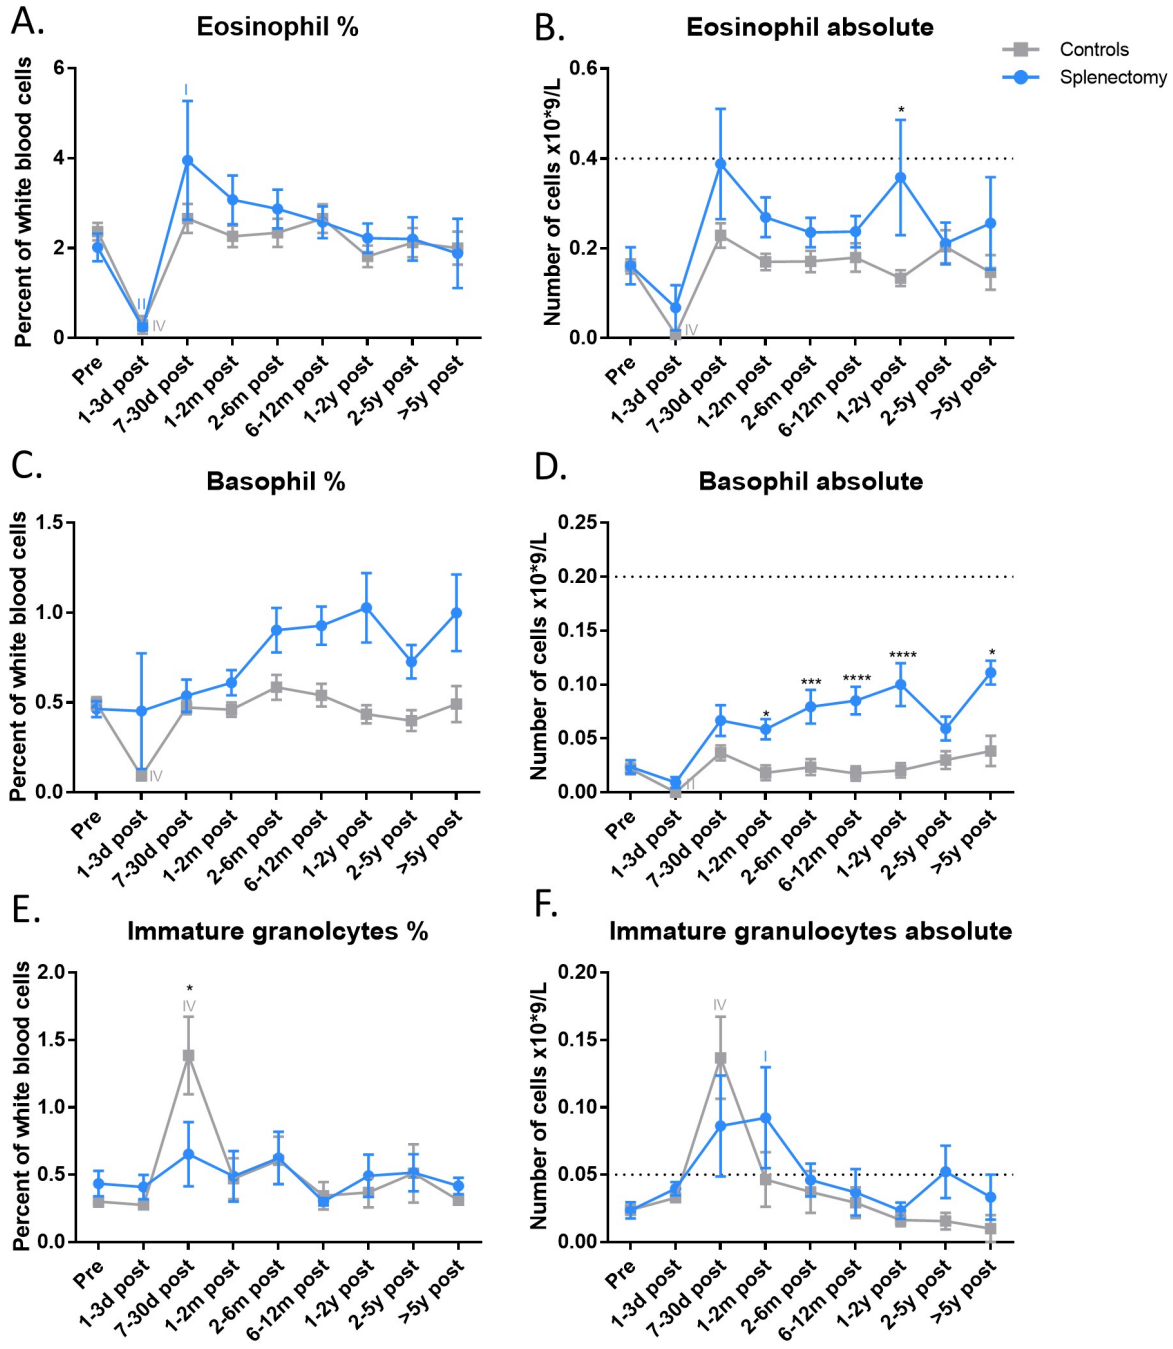

**Supplementary Table 1. Number of patients included at each blood draw timepoint.**

| <b>Splenectomized Patients</b>     | <b>White Blood Cell Count</b> | <b>Red Blood Cell Count</b> | <b>Platelet Count</b> | <b>Neutrophil %</b> | <b>Lymphocyte %</b> | <b>Monocyte %</b> | <b>Eosinophil %</b> | <b>Basophil %</b> | <b>Immature granulocyte %</b> | <b>Neutrophils absolute</b> | <b>Lymphocytes absolute</b> | <b>Monocytes absolute</b> | <b>Eosinophils absolute</b> | <b>Basophils absolute</b> | <b>Immature granulocytes absolute</b> |
|------------------------------------|-------------------------------|-----------------------------|-----------------------|---------------------|---------------------|-------------------|---------------------|-------------------|-------------------------------|-----------------------------|-----------------------------|---------------------------|-----------------------------|---------------------------|---------------------------------------|
| <b>Pre op</b>                      | 94                            | 94                          | 94                    | 58                  | 58                  | 58                | 58                  | 58                | 55                            | 59                          | 59                          | 59                        | 59                          | 59                        | 55                                    |
| <b>1-3d</b>                        | 92                            | 92                          | 91                    | 68                  | 68                  | 68                | 68                  | 68                | 66                            | 68                          | 68                          | 68                        | 68                          | 68                        | 64                                    |
| <b>7-30d</b>                       | 59                            | 59                          | 59                    | 24                  | 24                  | 24                | 24                  | 24                | 21                            | 24                          | 24                          | 24                        | 24                          | 24                        | 21                                    |
| <b>1-2m</b>                        | 34                            | 34                          | 34                    | 30                  | 30                  | 30                | 29                  | 29                | 26                            | 30                          | 30                          | 30                        | 29                          | 29                        | 26                                    |
| <b>2-6m</b>                        | 41                            | 41                          | 41                    | 38                  | 38                  | 38                | 38                  | 38                | 31                            | 40                          | 40                          | 40                        | 39                          | 38                        | 30                                    |
| <b>6-12m</b>                       | 31                            | 31                          | 30                    | 25                  | 25                  | 25                | 25                  | 25                | 21                            | 27                          | 27                          | 27                        | 27                          | 27                        | 23                                    |
| <b>1-2y</b>                        | 35                            | 35                          | 35                    | 30                  | 30                  | 30                | 30                  | 30                | 25                            | 33                          | 33                          | 33                        | 33                          | 33                        | 27                                    |
| <b>2-5y</b>                        | 30                            | 30                          | 30                    | 23                  | 23                  | 23                | 23                  | 23                | 20                            | 27                          | 27                          | 26                        | 26                          | 26                        | 22                                    |
| <b>&gt;5y</b>                      | 9                             | 9                           | 9                     | 6                   | 6                   | 6                 | 6                   | 6                 | 6                             | 9                           | 9                           | 9                         | 9                           | 9                         | 9                                     |
| <b>Non-Splenectomized Patients</b> |                               |                             |                       |                     |                     |                   |                     |                   |                               |                             |                             |                           |                             |                           |                                       |
| <b>Pre op</b>                      | <b>91</b>                     | <b>91</b>                   | <b>91</b>             | <b>70</b>           | <b>70</b>           | <b>69</b>         | <b>69</b>           | <b>69</b>         | <b>69</b>                     | <b>70</b>                   | <b>70</b>                   | <b>69</b>                 | <b>69</b>                   | <b>69</b>                 | <b>69</b>                             |
| <b>1-3d</b>                        | 86                            | 86                          | 86                    | 75                  | 75                  | 75                | 75                  | 75                | 75                            | 75                          | 75                          | 75                        | 75                          | 75                        | 74                                    |
| <b>7-30d</b>                       | 75                            | 75                          | 74                    | 50                  | 50                  | 49                | 49                  | 49                | 46                            | 50                          | 50                          | 49                        | 49                          | 49                        | 46                                    |
| <b>1-2m</b>                        | 36                            | 36                          | 36                    | 34                  | 34                  | 33                | 33                  | 33                | 32                            | 34                          | 34                          | 33                        | 33                          | 33                        | 32                                    |
| <b>2-6m</b>                        | 38                            | 38                          | 38                    | 35                  | 35                  | 35                | 35                  | 35                | 28                            | 35                          | 35                          | 35                        | 35                          | 35                        | 28                                    |
| <b>6-12m</b>                       | 35                            | 35                          | 35                    | 35                  | 35                  | 34                | 34                  | 34                | 27                            | 35                          | 35                          | 34                        | 34                          | 34                        | 27                                    |
| <b>1-2y</b>                        | 40                            | 40                          | 40                    | 37                  | 37                  | 35                | 35                  | 35                | 30                            | 37                          | 37                          | 35                        | 35                          | 35                        | 30                                    |
| <b>2-5y</b>                        | 44                            | 44                          | 44                    | 35                  | 35                  | 35                | 35                  | 35                | 31                            | 40                          | 40                          | 39                        | 39                          | 39                        | 31                                    |
| <b>&gt;5y</b>                      | 15                            | 15                          | 15                    | 12                  | 12                  | 12                | 12                  | 12                | 10                            | 12                          | 12                          | 12                        | 12                          | 12                        | 10                                    |

**Supplementary Table 2. Metal conjugated antibodies used.**

| <b>Metal Conjugate</b> | <b>Specificity</b> | <b>Clustering</b> | <b>Metal Conjugate</b> | <b>Specificity</b> | <b>Clustering</b>       |
|------------------------|--------------------|-------------------|------------------------|--------------------|-------------------------|
| Bi209                  | CD16               | Figures 3,4,5     | Nd143                  | CD123              | Figures 3,4,5           |
| Dy161                  | Tbet               | Figures 3,4,5     | Nd144                  | CCR5               | Figures 3,4,5           |
| Dy162                  | CD11c              | Figures 3,4,5     | Nd145                  | CD7                | Figures 3,4,5           |
| Dy164                  | CD15               | Figures 3,5       | Nd146                  | IgD                | Figure 3                |
| Er166                  | EOMES              | Figures 3,4,5     | Nd148                  | CD38               | Figures 3,4,5           |
| Er167                  | CCR7               | Figures 3,4,5     | Nd150                  | CD86               | Figure 3,4,5            |
| Er168                  | CD8a               | Figures 3,4,5     | Pr141                  | CCR6               | Figures 3,4,5           |
| Er170                  | CD33               | Figures 3,4,5     | Sm147                  | CD1c               | Figures 3,4,5           |
| Eu151                  | ICOS               | Figures 3,4,5     | Sm149                  | CD127              | Figures 3,4,5           |
| Eu153                  | CD11b              | Figures 3,4,5     | Sm152                  | CD141              | Figures 3,4,5           |
| Gd155                  | CD27               | Figures 3,4,5     | Sm154                  | CD3                | Figure 3                |
| Gd156                  | CXCR3              | Figures 3,4,5     | Tb159                  | PDL1               | Figures 3,4,5           |
| Gd158                  | PD1                | Figures 3,4,5     | Tm169                  | CD25               | Figures 3,4,5           |
| Gd160                  | CD14               | Figures 3,5       | Y89                    | CD45               | Not used for clustering |
| Ho165                  | FoxP3              | Figures 3,4,5     | Yb171                  | CXCR5              | Figures 3,4,5           |
| In113                  | CD45RO             | Figures 3,4,5     | Yb172                  | IgM                | Figure 3                |
| In115                  | CD66b              | Figures 3,5       | Yb173                  | HLA-DR             | Figures 3,4,5           |
| Lu175                  | CCR4               | Figures 3,4,5     | Yb174                  | CD4                | Figures 3,4,5           |
| Nd142                  | CD19               | Figure 3          | Yb176                  | CD56               | Figures 3,4,5           |

**Supplementary Table 3. Markers used to identify cellular populations.**

| <b>All CD45+ cells (Figure 3)</b><br><b>(gated on CD45+ cells)</b>                                   |  | <b>Markers used to identify cell types</b>                                                                                                                                                                                           |
|------------------------------------------------------------------------------------------------------|--|--------------------------------------------------------------------------------------------------------------------------------------------------------------------------------------------------------------------------------------|
| B cells                                                                                              |  | CD19 <sup>+</sup> HLA-DR <sup>+</sup>                                                                                                                                                                                                |
| T cells                                                                                              |  | CD3 <sup>+</sup>                                                                                                                                                                                                                     |
| Myeloid cells                                                                                        |  | CD3 <sup>-</sup> CD19 <sup>-</sup> CD11b/CD66b/CD14/CD15 <sup>+</sup>                                                                                                                                                                |
| NK and Other cells                                                                                   |  | CD3 <sup>-</sup> CD19 <sup>-</sup> CD14 <sup>-</sup> CD15 <sup>-</sup> CD56 <sup>+/-</sup>                                                                                                                                           |
| <b>T cells (Figure 4)</b><br><b>(gated on CD45<sup>+</sup>CD3<sup>+</sup>CD19<sup>-</sup>)</b>       |  |                                                                                                                                                                                                                                      |
| Naïve CD4 <sup>+</sup> T cells                                                                       |  | CD4 <sup>+</sup> CD45RO <sup>-</sup> CD27 <sup>+</sup> CD127 <sup>low</sup> PD1 <sup>-</sup> CD38 <sup>+</sup> CD11b <sup>-</sup> CD25 <sup>-</sup> Tbet <sup>-</sup><br>CCR4 <sup>low</sup> CCR6 <sup>low</sup> CCR7 <sup>low</sup> |
| Memory/Effector Memory CD4 <sup>+</sup> T cells                                                      |  | CD4 <sup>+</sup> CD45RO <sup>+</sup> CD27 <sup>+</sup> CD127 <sup>High</sup> PD1 <sup>-</sup> CD38 <sup>-</sup> CD11b <sup>-</sup> CD25 <sup>+</sup> Tbet <sup>-</sup><br>CCR4 <sup>High</sup> CCR6 <sup>+</sup> CCR7 <sup>-</sup>   |
| Terminally Differentiated CD4 <sup>+</sup> T cells                                                   |  | CD4 <sup>+</sup> CD45RO <sup>+/-</sup> CD27 <sup>-</sup> CD127 <sup>-</sup> PD1 <sup>+</sup> CD38 <sup>-</sup> CD11b <sup>+</sup> CD25 <sup>-</sup> Tbet <sup>High</sup><br>CCR4 <sup>High</sup> CCR6 <sup>-</sup> CCR7 <sup>-</sup> |
| Naïve CD8 <sup>+</sup> T cells                                                                       |  | CD8 <sup>+</sup> CD45RO <sup>-</sup> CD27 <sup>High</sup> CD127 <sup>low</sup> PD1 <sup>-</sup> CD11b <sup>+</sup> CD25 <sup>-</sup> Tbet <sup>-</sup><br>CCR4 <sup>low</sup> CCR6 <sup>low</sup> CCR7 <sup>low</sup>                |
| Memory/Effector Memory CD8 <sup>+</sup> T cells                                                      |  | CD8 <sup>+</sup> CD45RO <sup>+/-</sup> CD27 <sup>low</sup> CD127 <sup>low</sup> PD1 <sup>low</sup> CD11b <sup>+</sup> CD25 <sup>+</sup> Tbet <sup>low</sup><br>CCR4 <sup>High</sup> CCR6 <sup>+</sup> CCR7 <sup>-</sup>              |
| Terminally Differentiated CD8 <sup>+</sup> T cells                                                   |  | CD8 <sup>+</sup> CD45RO <sup>+/-</sup> CD27 <sup>-</sup> CD127 <sup>-</sup> PD1 <sup>low</sup> CD11b <sup>+</sup> CD25 <sup>-</sup> Tbet <sup>High</sup><br>CCR4 <sup>High</sup> CCR6 <sup>-</sup> CCR7 <sup>-</sup>                 |
| <b>Myeloid cells (Figure 5)</b><br><b>(gated on CD45<sup>+</sup>CD3<sup>-</sup>CD19<sup>-</sup>)</b> |  |                                                                                                                                                                                                                                      |
| Neutrophils                                                                                          |  | CD14 <sup>-</sup> CD15 <sup>+</sup> CD66b <sup>+</sup> CD11b <sup>+</sup> CD16 <sup>+/-</sup> HLA-DR <sup>-</sup> CCR4 <sup>low</sup> CCR6 <sup>-/low</sup> CCR7 <sup>+/-</sup>                                                      |
| Monocytes                                                                                            |  | CD14 <sup>+</sup> CD15 <sup>-</sup> CD66b <sup>-</sup> CD11b <sup>+</sup> CD16 <sup>-/low</sup> HLA-DR <sup>+/-</sup> CCR4 <sup>+</sup> CCR6 <sup>low</sup> CCR7 <sup>-/low</sup>                                                    |
| Dendritic cells                                                                                      |  | CD14 <sup>-/low</sup> CD66b <sup>-</sup> CD15 <sup>-</sup> CD11b <sup>+</sup> CD11c <sup>+</sup> HLA-DR <sup>High</sup> CCR4 <sup>+</sup> CCR6 <sup>+/-</sup> CCR7 <sup>-</sup>                                                      |
| NK and other cells                                                                                   |  | CD14 <sup>-</sup> CD66b <sup>-</sup> CD15 <sup>-</sup> CD56 <sup>+/-</sup> CD16 <sup>+/-</sup> HLA-DR <sup>+/-</sup> CD25 <sup>+/-</sup> CCR4 <sup>+/-</sup> CCR6 <sup>-/low</sup> CCR7 <sup>-</sup>                                 |
